# Supplementary material for: Introducing Telemedicine in Italy: Citizens’ Awareness of a New Healthcare Resource
Source: MDPI journal article supplement (doi:10.3390/healthcare11152157), 2023-07-28
Supplement: s1 [file s1]

## **Supplementary File S1. Questionnaire used in the study.**

### **TeleMedicine in Italy – TeMI questionnaire**

#### **Presentation of the study**

In recent years, also in relation to the boost given by social restrictions due to the COVID-19 pandemic, the development of information technologies has made it possible for healthcare institutions to provide some services electronically (so-called telemedicine). Today in various Italian regions it is possible to consult one's health data on the personal electronic file, or undergo medical visits and consultations through the use of the internet. In order to evaluate the perception of the Italian population towards this innovation, we ask you to answer the questionnaire below. Filling out the questionnaire takes only a few minutes.

Participation in this survey is voluntary and anonymous. Your data will be collected and analyzed with respect for privacy and will not be passed on to third parties. All collected data will be used in aggregate mode and only for scientific purposes. The information provided will not allow the participants to be traced.

By participating in this survey, you confirm that you are over 18 years old, that you have been sufficiently informed about the purposes of the study and that you have acquired the necessary information on the processing of your data in compliance with privacy, pursuant to Legislative Decree 101/2018.

#### **1. SOCIO-DEMOGRAPHIC AND HEALTH INFORMATION**

*Indicate your age* \_\_\_\_\_

*Indicate your sex*

Male

Female

Other

*Please indicate your region of residence* \_\_\_\_\_

*Please indicate your marital status/current relationship status*

Married

cohabitant

I'm in a relationship with someone I don't live with

Separated/Divorced

Widow

Single (never married, not in a relationship currently)

*Do you have children?*

Yes

No

*What is your educational level?*

Mandatory to high school

Degree or post-degree

*Please indicate your current occupational status*

Student

Unemployed

Employed

Retired

*Please indicate where you currently live*

My home

Someone else's house (studying/working offsite)

Someone else's house (as a guest)

Nursing home

*Do you have any chronic condition (hypertension, diabetes, cancer, etc.)?*

Yes

No

## 2. TELEMEDICINE

*Are there active telemedicine services in your region (medical visits, consultations, diagnostic services provided via the internet - excluding only booking and report collection services, and electronic health data records)?*

Yes

No

I don't know

*If yes, how did you find out about it?*

Through my doctor

I work in healthcare

Through advertising

Through friends/relatives

*If yes, have you ever used it?*

No

Yes, for me, by myself  
Yes, for me, with someone's help  
Yes, for a family member of mine

*If you have used these services, are you satisfied?*

No  
Yes

*If telemedicine services are active in your region but you have never used them, why?*

I haven't needed them but I think I'd be able to use them  
I have difficulty using them (I don't have internet access, I don't know how to do it)  
I would have no difficulty using them but I prefer to use these services in person

*If you answered "I would have no difficulty using them but I prefer to use these services in person" to the previous question, please indicate why*

I don't want my data to end up on the internet  
I prefer to talk about my health problems in person  
I am afraid that the treatments offered in this way would not be complete/effective

*If no telemedicine services are active in your region, would you be inclined to use them if they were activated?*

No  
Yes

### 3. ELECTRONIC HEALTH DATA RECORDS

*Is the electronic health record offered by the Regional Health Service or by your ASL active in your region?*

No  
Yes  
I don't know

*If yes, how did you find out about it?*

Through my doctor  
I work in healthcare  
Through advertising  
Through friends/relatives

*If yes, have you ever used it?*

No

Yes, for me, independently  
Yes, for me, with someone's help  
Yes, for a family member of mine

*If you have used this service, are you satisfied?*

No  
Yes

*If the electronic health record is active in your region but you have never used them, please indicate why*

I haven't needed them but I think I'd be able to use it  
I have difficulty using it (I don't have internet access, I don't know how to do it)  
I would have no difficulty using it but I prefer to keep my health data

*If you answered that you prefer to keep your health data, please indicate why*

I don't want my data are placed on the internet  
I want to be the one to decide what to let the doctor know  
I'm afraid that data can be lost/the electronic health record doesn't work when I need to consult it

*If the electronic health record is not yet available in your region, would be inclined to use it if it is activated?*

No  
Yes
